# Supplementary material
Source: Research Square preprint supplement (doi:10.21203/rs.3.rs-9706036/v1)
Supplement: Supplementary file 1 [file 69d80c0892252ad7c089ef2e.docx]

**Supplementary Material**

**Supplementary Table S1** Classification based on T-score and the osteoporosis questionnaire

**Supplementary Table S2** Association of continuous sleep duration with prevalent osteoporosis among postmenopausal women

**Supplementary Table S3** Association between physical activity status and osteoporosis among postmenopausal women

**Supplementary Table S4** Association of sleep duration with osteoporosis after excluding participants with missing covariates

**Supplementary Table S5** Association of sleep duration with osteoporosis after excluding extreme sleep durations (≤3 h or ≥12 h)

**Supplementary Table S6** Association of sleep duration with osteoporosis after redefining osteoporosis using femoral neck BMD alone

**Supplementary Figure S1** Distribution of Missing Values Across Covariates

**Supplementary Figure S2** Nonlinear association between sleep duration and osteoporosis after excluding participants with missing covariate data

**Supplementary Figure S3** Nonlinear association between sleep duration and osteoporosis after excluding extreme sleep durations (≤3 h or ≥12 h)

**Supplementary Figure S4** Nonlinear association between sleep duration and osteoporosis after redefining osteoporosis using femoral neck BMD alone

**Supplementary Table S1** Classification based on T-score and the osteoporosis questionnaire

| **Source** | **Level** | **Definition** | **Outcome** |
| --- | --- | --- | --- |
| **Calculated T-score** | T-score ≥ −1 SD | Normal bone mass | Normal bone mineral density |
|  | −2.5 SD < T-score < −1 SD | Low bone mass (osteopenia) | Low bone mineral density |
|  | T-score ≤ −2.5 SD | Osteoporosis | Osteoporosis |
| **Osteoporosis questionnaire** | Yes or No | Self-reported osteoporosis | Osteoporosis |

Participants were asked: “Has a doctor or health professional ever told you that you have osteoporosis?” Those who answered “Yes” were defined as self-reported osteoporosis cases.

**Supplementary Table S2** Association of continuous sleep duration with prevalent osteoporosis among postmenopausal women

| **Variables** | **Model 1** |  | **Model 2** |  | **Model 3** |  |
| --- | --- | --- | --- | --- | --- | --- |
| **OR (95% CI)** | ***P value*** | **OR (95% CI)** | ***P value*** | **OR (95% CI)** | ***P value*** |
| Sleep duration | 0.96 (0.86-1.07) | 0.468 | 0.98 (0.89-1.09) | 0.733 | 0.97 (0.88-1.08) | 0.595 |

Adjusted for:

Model 1: age, race

Model 2: Model 1, marriage status, level of education, smoking status, PIR, PA, energy intake

Model 3: Model 2, BMI, sex hormone, serum vitamin D, serum calcium, hypertension, diabetes, CKD, hyperlipidemia, cancer

**Supplementary Table S3** Association between physical activity status and osteoporosis among postmenopausal women

| **Variables** | **Model 1** |  | **Model 2** |  | **Model 3** |  |
| --- | --- | --- | --- | --- | --- | --- |
| **OR (95% CI)** | ***P value*** | **OR (95% CI)** | ***P value*** | **OR (95% CI)** | ***P value*** |
| PA |  |  |  |  |  |  |
| Low | 1.00 (Reference) |  | 1.00 (Reference) |  | 1.00 (Reference) |  |
| High | 0.72 (0.56 - 0.93) | **0.015** | 0.70 (0.54 - 0.91) | **0.010** | 0.74 (0.57 - 0.96) | **0.027** |

Adjusted for:

Model 1: age, race

Model 2: Model 1, marriage status, level of education, smoking status, PIR, energy intake

Model 3: Model 2, Sleep duration , BMI, sex hormone, serum vitamin D, serum calcium, hypertension, diabetes, CKD, hyperlipidemia, cancer

**Supplementary Table S4** Association of sleep duration with osteoporosis after excluding participants with missing covariates

| **Variables** | **Model 1** |  | **Model 2** |  | **Model 3** |  |
| --- | --- | --- | --- | --- | --- | --- |
| **OR (95% CI)** | ***P value*** | **OR (95% CI)** | ***P value*** | **OR (95% CI)** | ***P value*** |
| Sleep duration |  |  |  |  |  |  |
| 7-9h | 1.00 (Reference) |  | 1.00 (Reference) |  | 1.00 (Reference) |  |
| <7h | 1.90 (1.36-2.66) | **<.001** | 1.69 (1.21-2.37) | **0.003** | 1.75 (1.24-2.46) | **0.002** |
| >9h | 3.46 (1.88-6.36) | **<.001** | 3.22 (1.66-6.25) | **<.001** | 3.55 (1.74-7.24) | **<.001** |

Adjusted for:

Model 1: age, race

Model 2: Model 1, marriage status, level of education, smoking status, PIR, PA, energy intake

Model 3: Model 2, BMI, sex hormone, serum vitamin D, serum calcium, hypertension, diabetes, CKD, hyperlipidemia, cancer

**Supplementary Table S5** Association of sleep duration with osteoporosis after excluding extreme sleep durations (≤3 h or ≥12 h)

| **Variables** | **Model 1** |  | **Model 2** |  | **Model 3** |  |
| --- | --- | --- | --- | --- | --- | --- |
| **OR (95% CI)** | ***P value*** | **OR (95% CI)** | ***P value*** | **OR (95% CI)** | ***P value*** |
| Sleep duration |  |  |  |  |  |  |
| 7-9h | 1.00 (Reference) |  | 1.00 (Reference) |  | 1.00 (Reference) |  |
| <7h | 1.72 (1.31-2.27) | **<.001** | 1.57 (1.20-2.06) | **0.002** | 1.60 (1.22-2.09) | **0.001** |
| >9h | 3.10 (1.78-5.40) | **<.001** | 2.93 (1.61-5.32) | **<.001** | 3.08 (1.59-5.99) | **0.001** |

Adjusted for:

Model 1: age, race

Model 2: Model 1, marriage status, level of education, smoking status, PIR, PA, energy intake

Model 3: Model 2, BMI, sex hormone, serum vitamin D, serum calcium, hypertension, diabetes, CKD, hyperlipidemia, cancer

**Supplementary Table S6** Association of sleep duration with osteoporosis after redefining osteoporosis using femoral neck BMD alone

| **Variables** | **Model 1** |  | **Model 2** |  | **Model 3** |  |
| --- | --- | --- | --- | --- | --- | --- |
| **OR (95% CI)** | ***P value*** | **OR (95% CI)** | ***P value*** | **OR (95% CI)** | ***P value*** |
| Sleep duration |  |  |  |  |  |  |
| 7-9h | 1.00 (Reference) |  | 1.00 (Reference) |  | 1.00 (Reference) |  |
| <7h | 1.54 (1.15-2.07) | **0.006** | 1.40 (1.04-1.88) | **0.030** | 1.40 (1.04-1.90) | **0.033** |
| >9h | 2.90 (1.60-5.25) | **<.001** | 2.76 (1.48-5.16) | **0.003** | 2.87 (1.40-5.91) | **0.007** |

Adjusted for:

Model 1: age, race

Model 2: Model 1, marriage status, level of education, smoking status, PIR, PA, energy intake

Model 3: Model 2, BMI, sex hormone, serum vitamin D, serum calcium, hypertension, diabetes, CKD, hyperlipidemia, cancer

**Supplementary Figure S1** Distribution of missing values across covariates


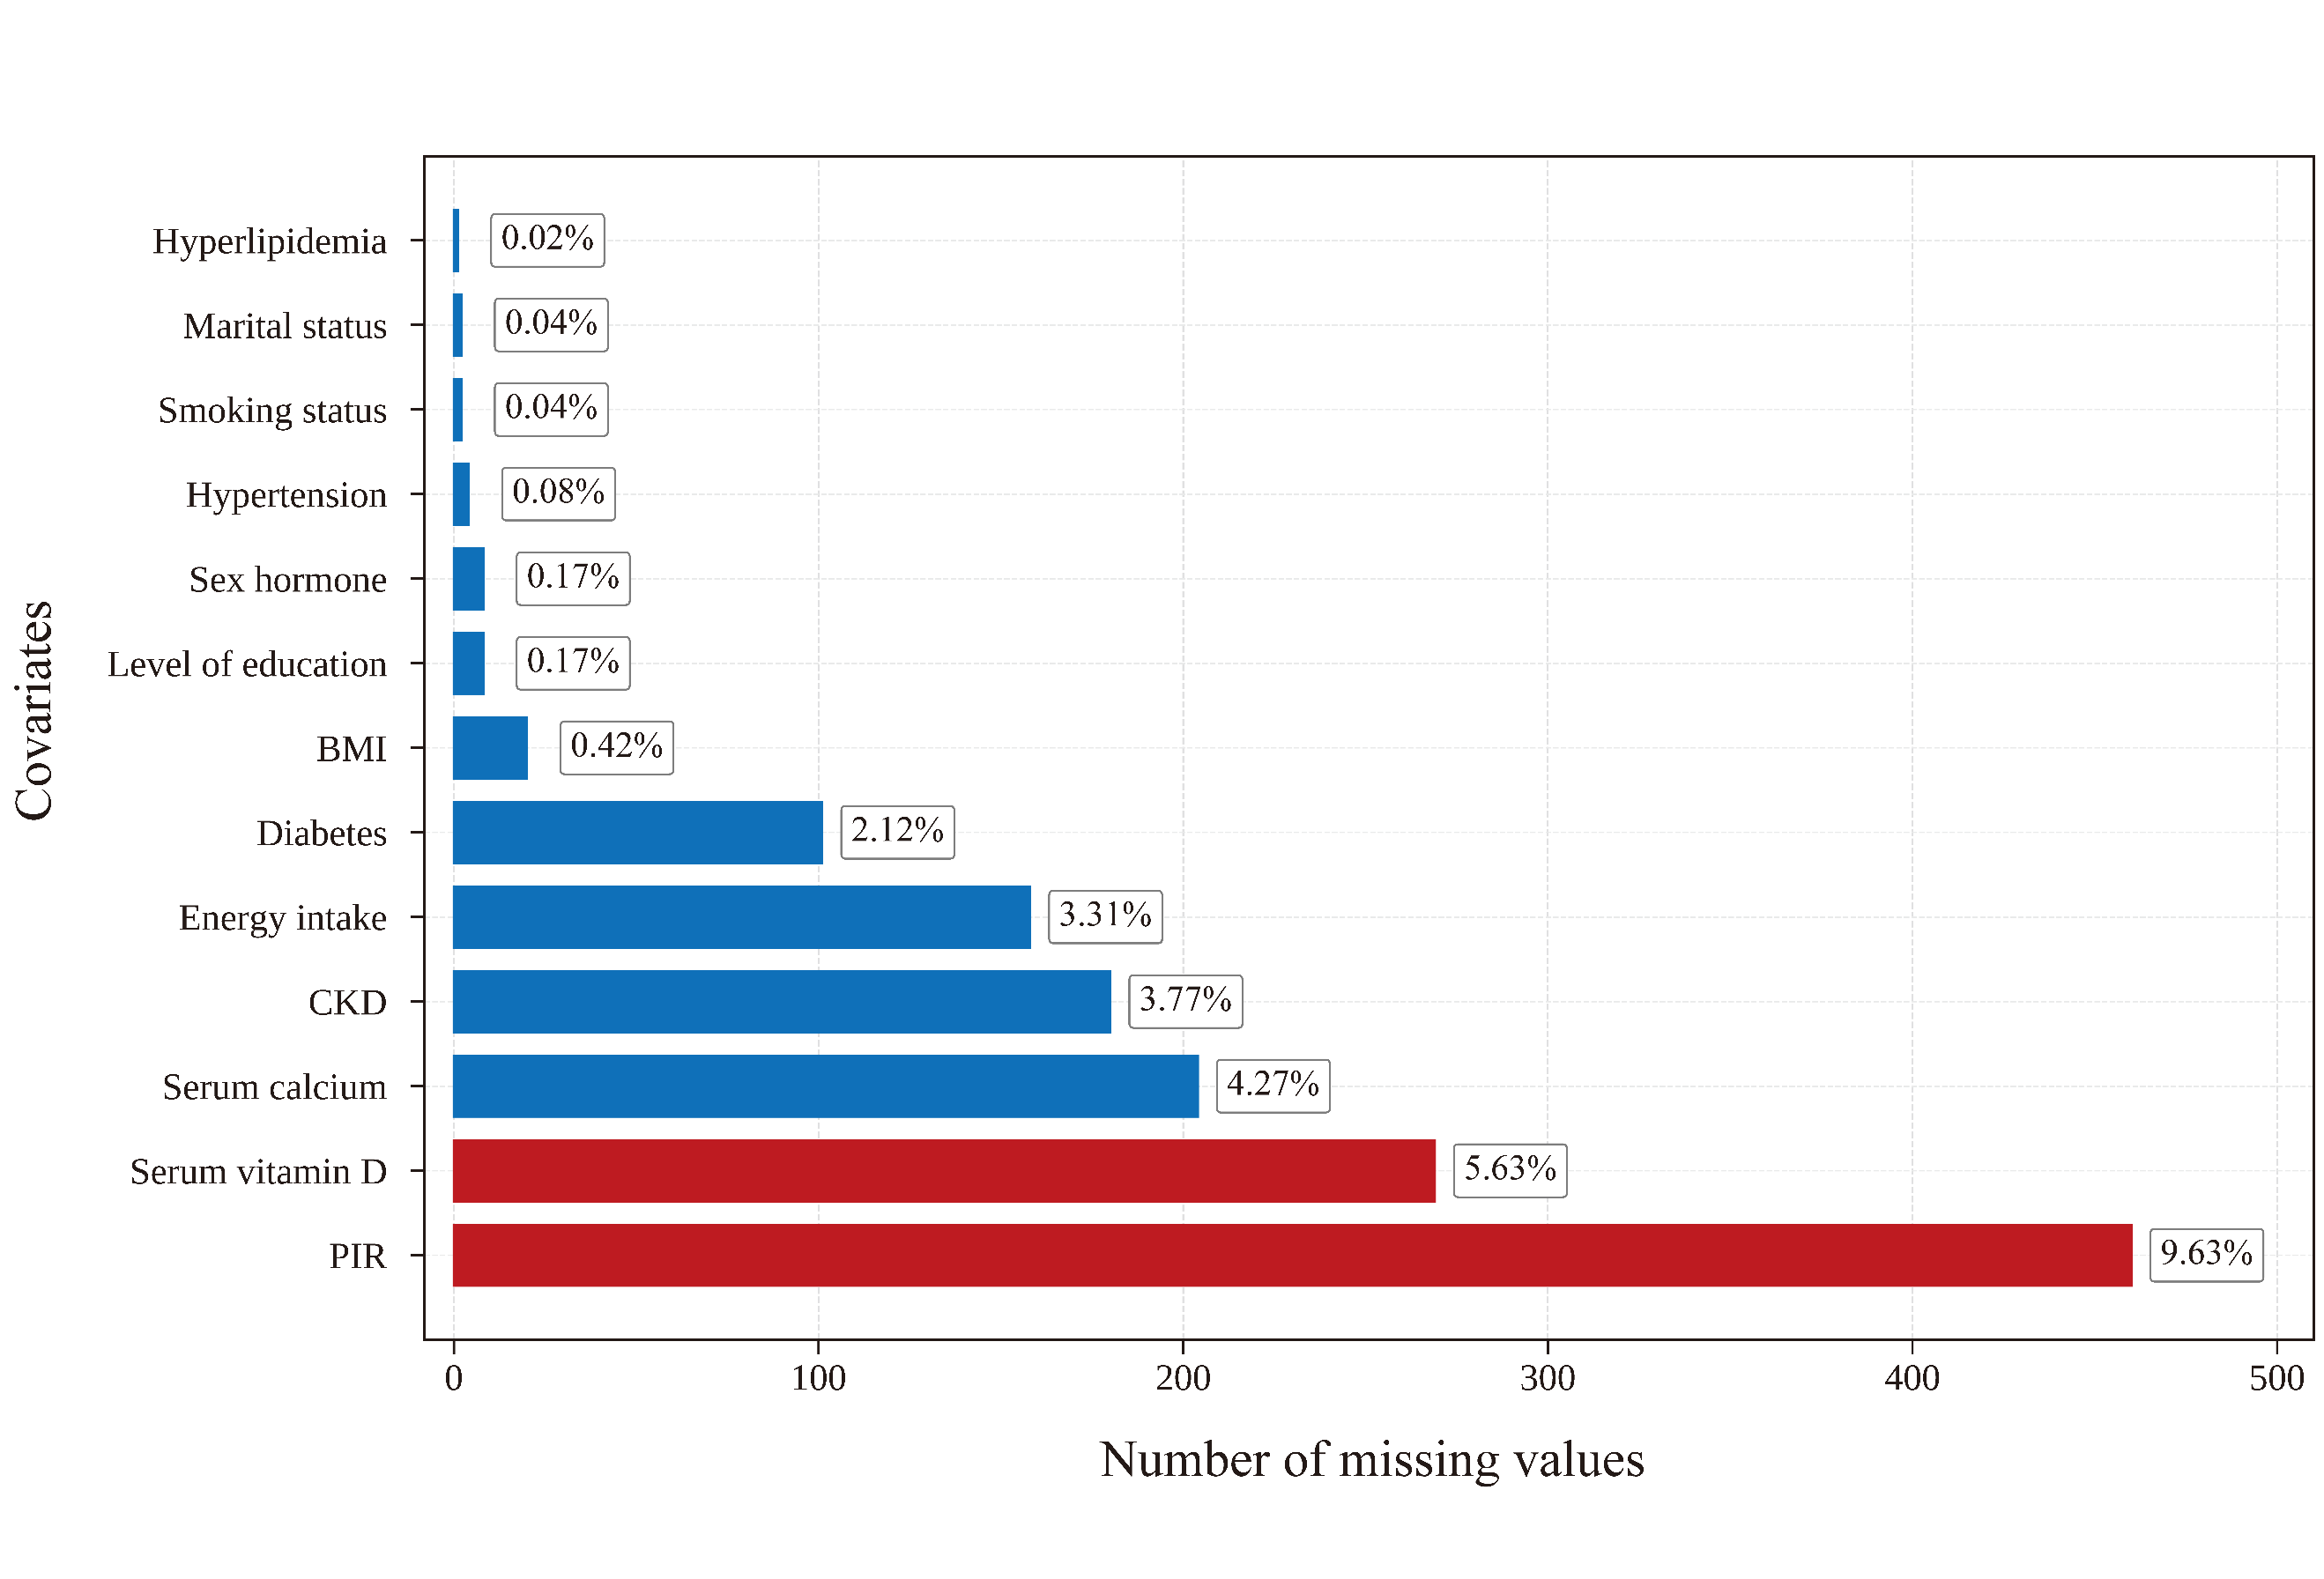


**Abbreviations:** BMI, body mass index; CKD, chronic kidney disease; PIR, poverty-income ratio. Covariates with no missing values, including age, race/ethnicity, cancer, and physical activity, are not shown. Blue bars indicate missing proportions ≤5%, and red bars indicate missing proportions >5%

**Supplementary Figure S2** Nonlinear association between sleep duration and osteoporosis after excluding participants with missing covariate data

**
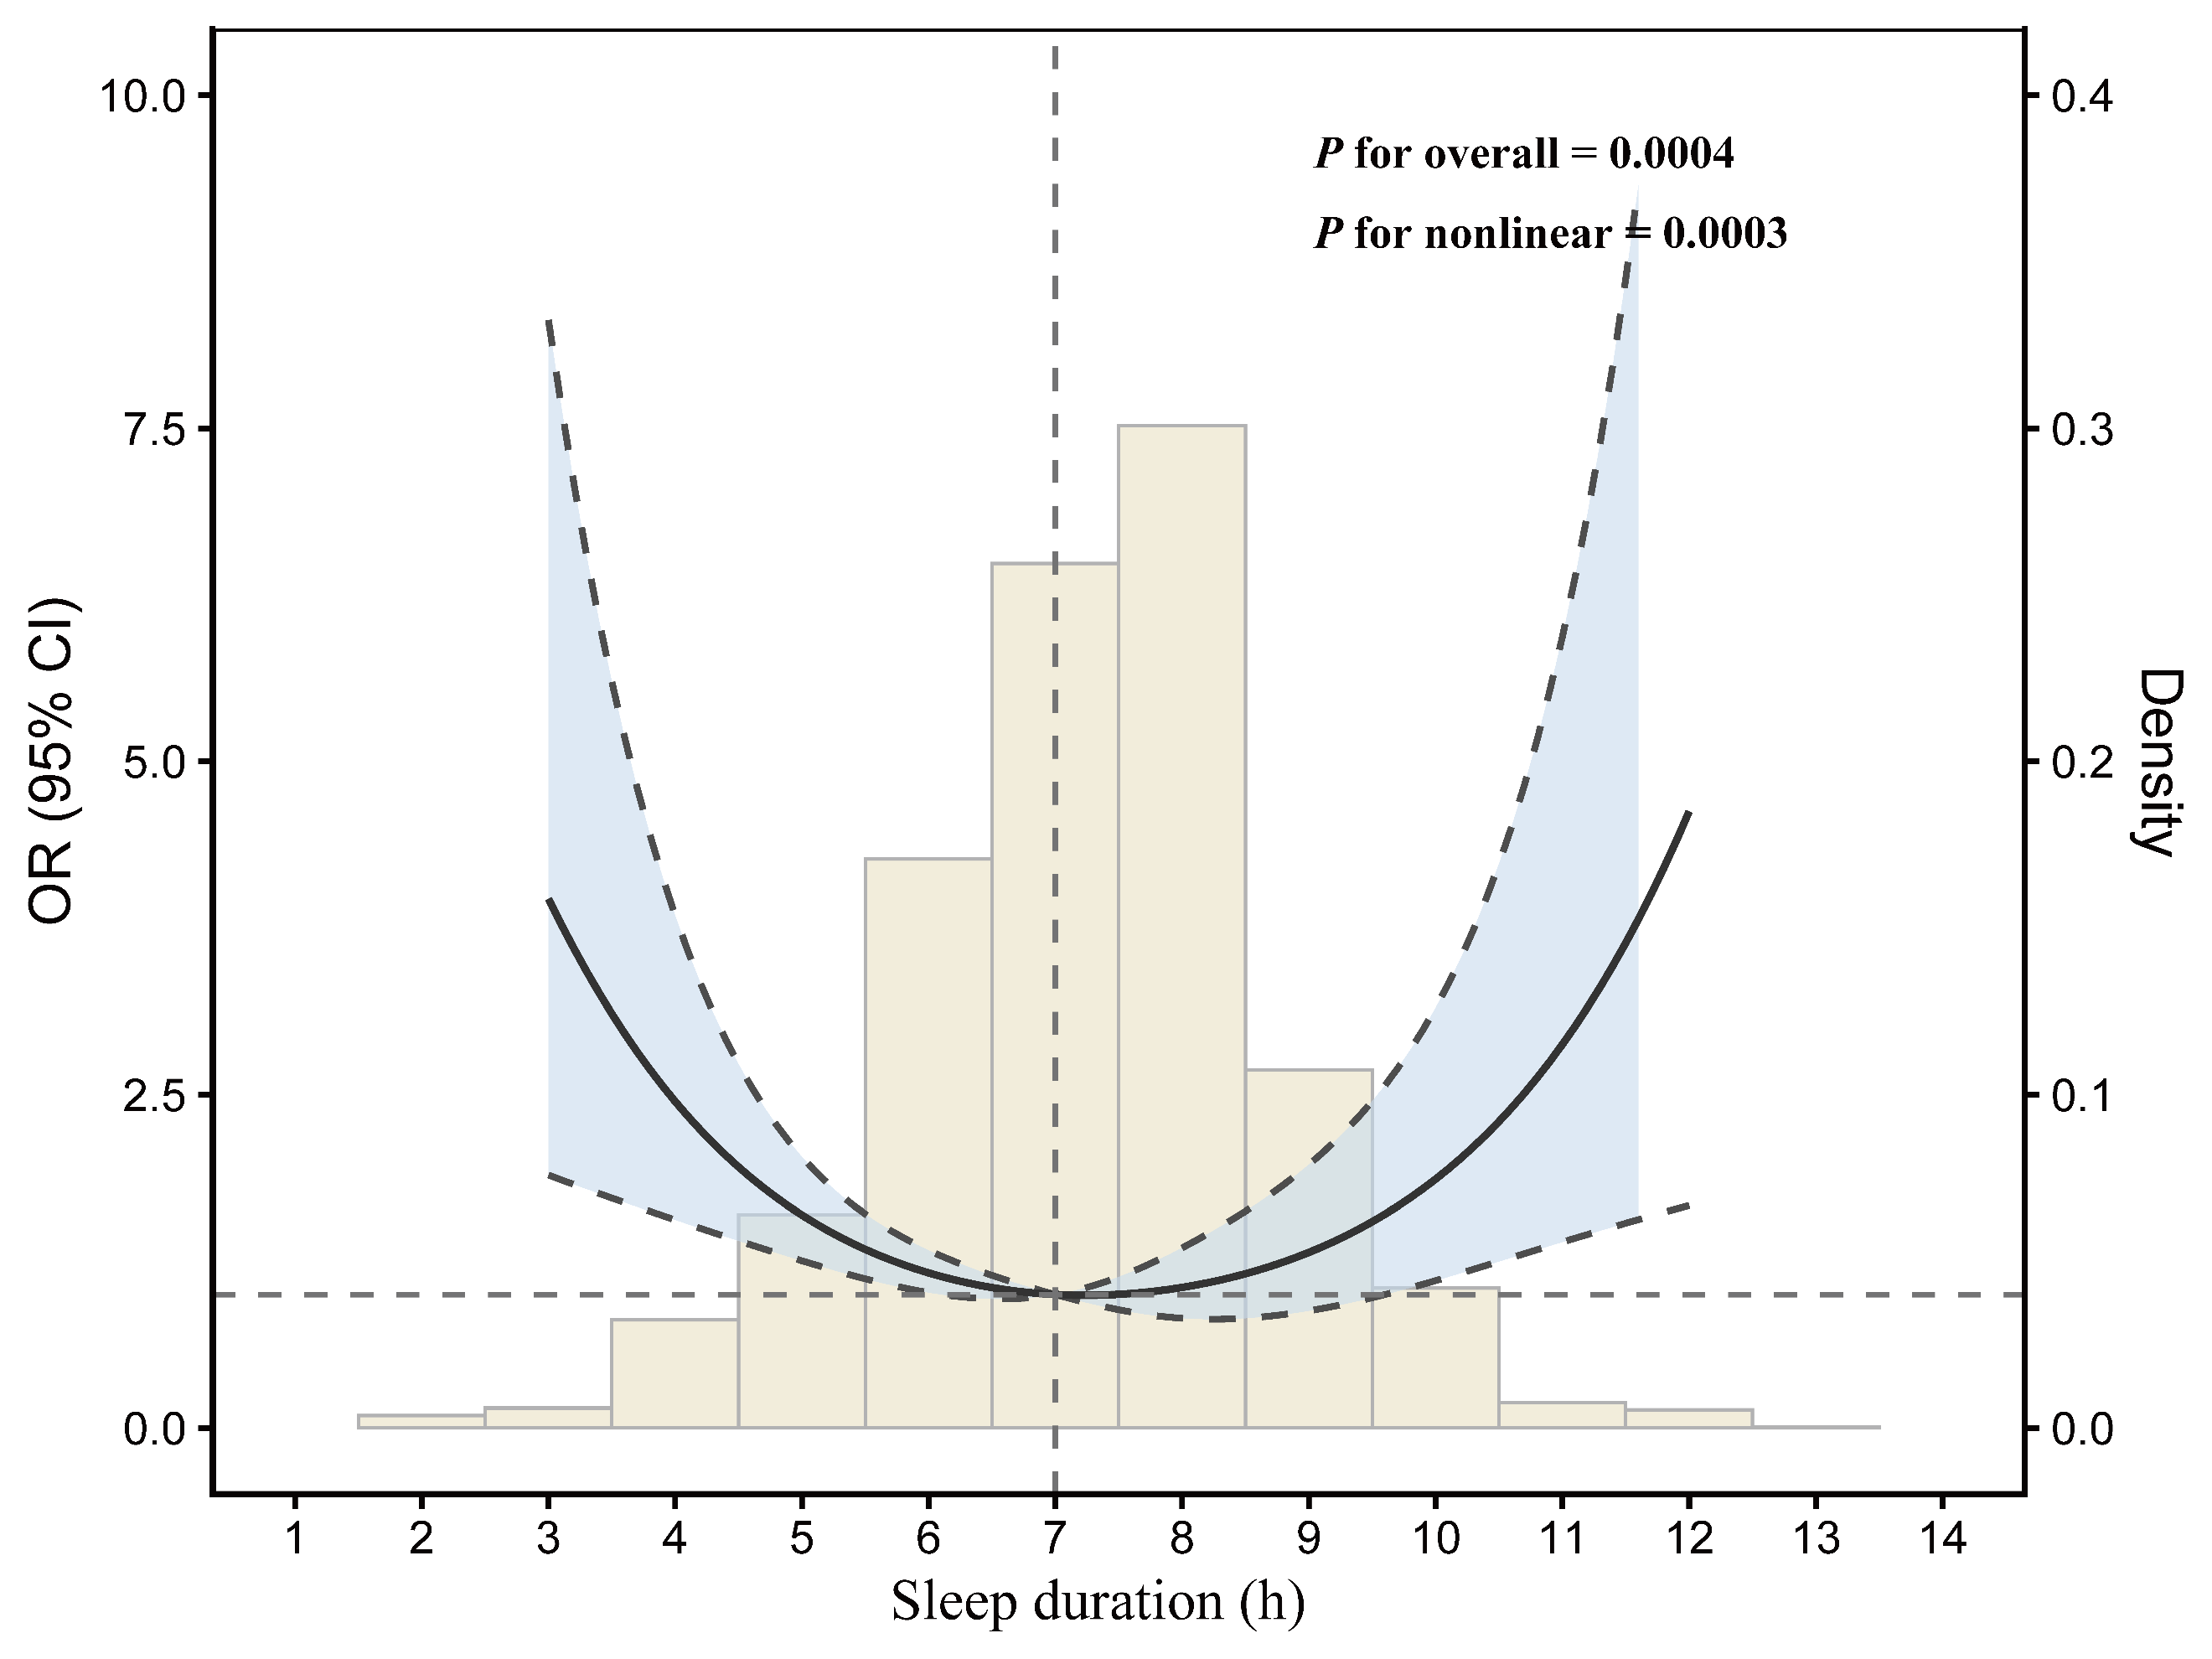
**

**Note:** Nonlinear association between sleep duration and osteoporosis after excluding participants with missing covariate data. The solid line represents the smoothed fitted curve, and the shaded area indicates the 95% confidence interval. Covariates adjusted for included age, race/ethnicity, marital status, level of education, smoking status, PIR, BMI, PA, sex hormone, energy intake, serum calcium, serum vitamin D, hypertension, diabetes, CKD, hyperlipidemia, and cancer

**Supplementary Figure S3** Nonlinear association between sleep duration and osteoporosis after excluding extreme sleep durations (≤3 h or ≥12 h)

**
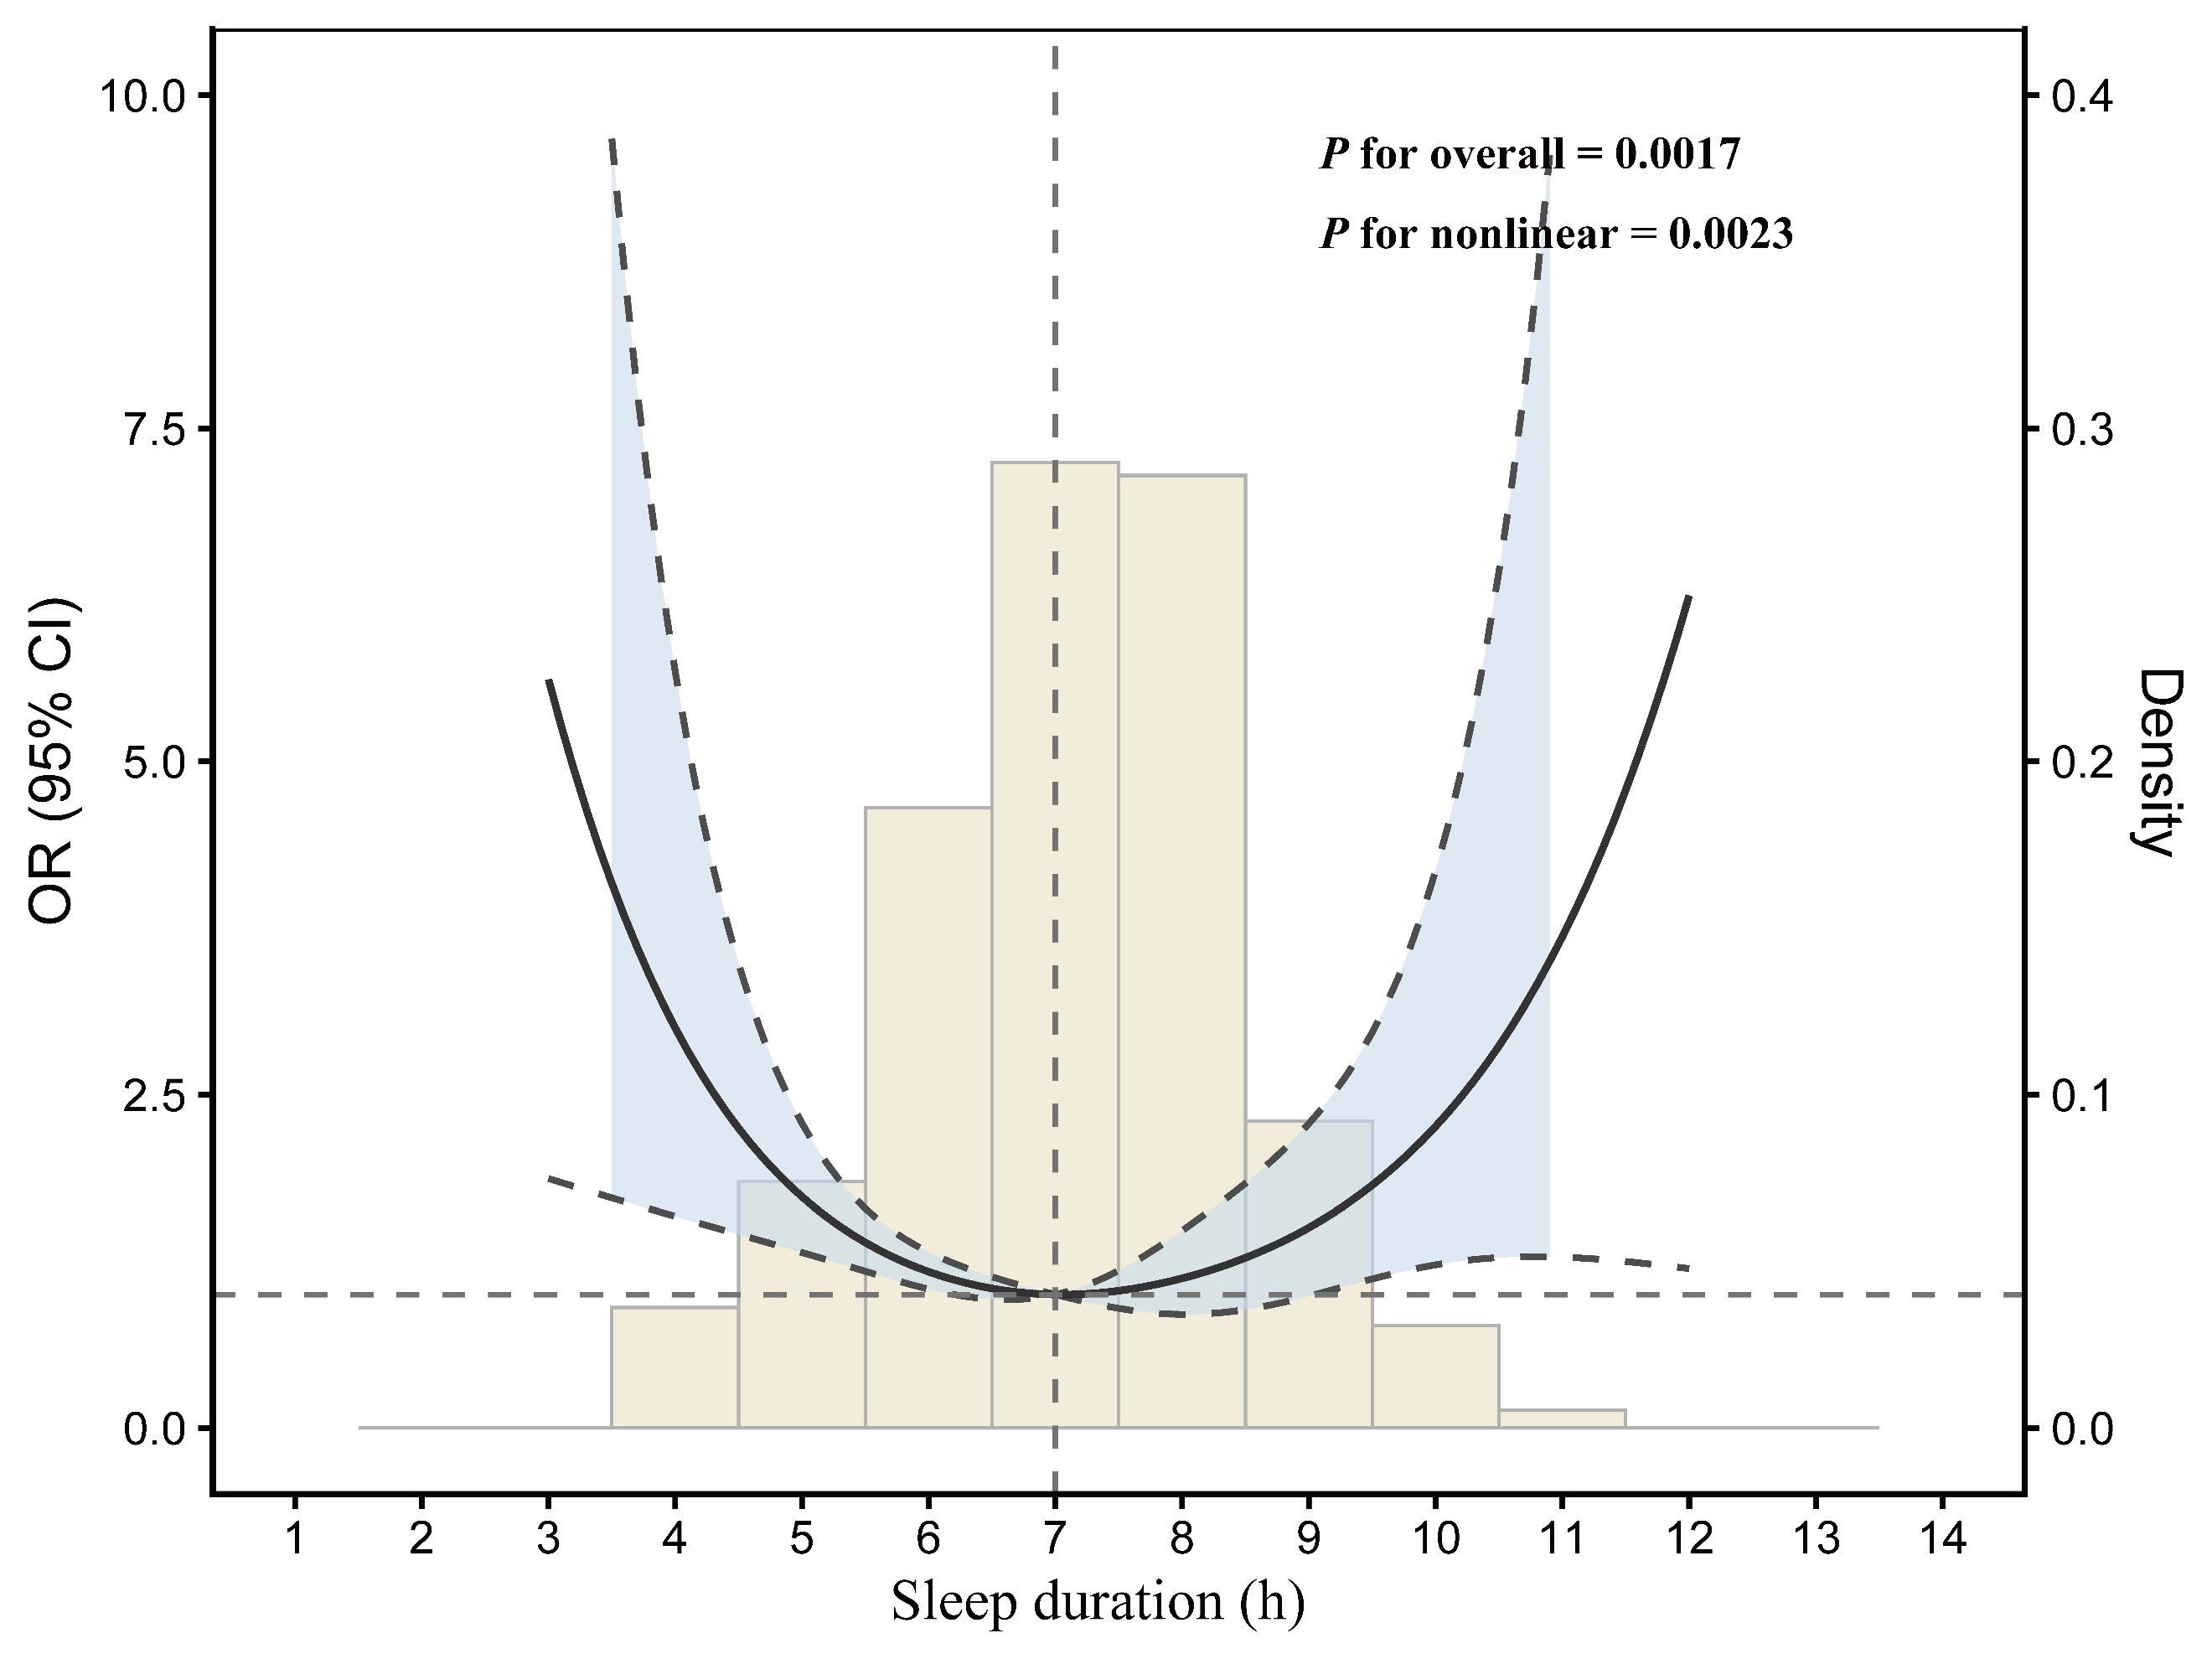
**

**Note:** Nonlinear association between sleep duration and osteoporosis after excluding extreme sleep durations (≤3 h or ≥12 h). The solid line represents the smoothed fitted curve, and the shaded area indicates the 95% confidence interval. Covariates adjusted for included age, race/ethnicity, marital status, level of education, smoking status, PIR, BMI, PA, sex hormone, energy intake, serum calcium, serum vitamin D, hypertension, diabetes, CKD, hyperlipidemia, and cancer

**Supplementary Figure S4** Nonlinear association between sleep duration and osteoporosis after redefining osteoporosis using femoral neck BMD alone

**
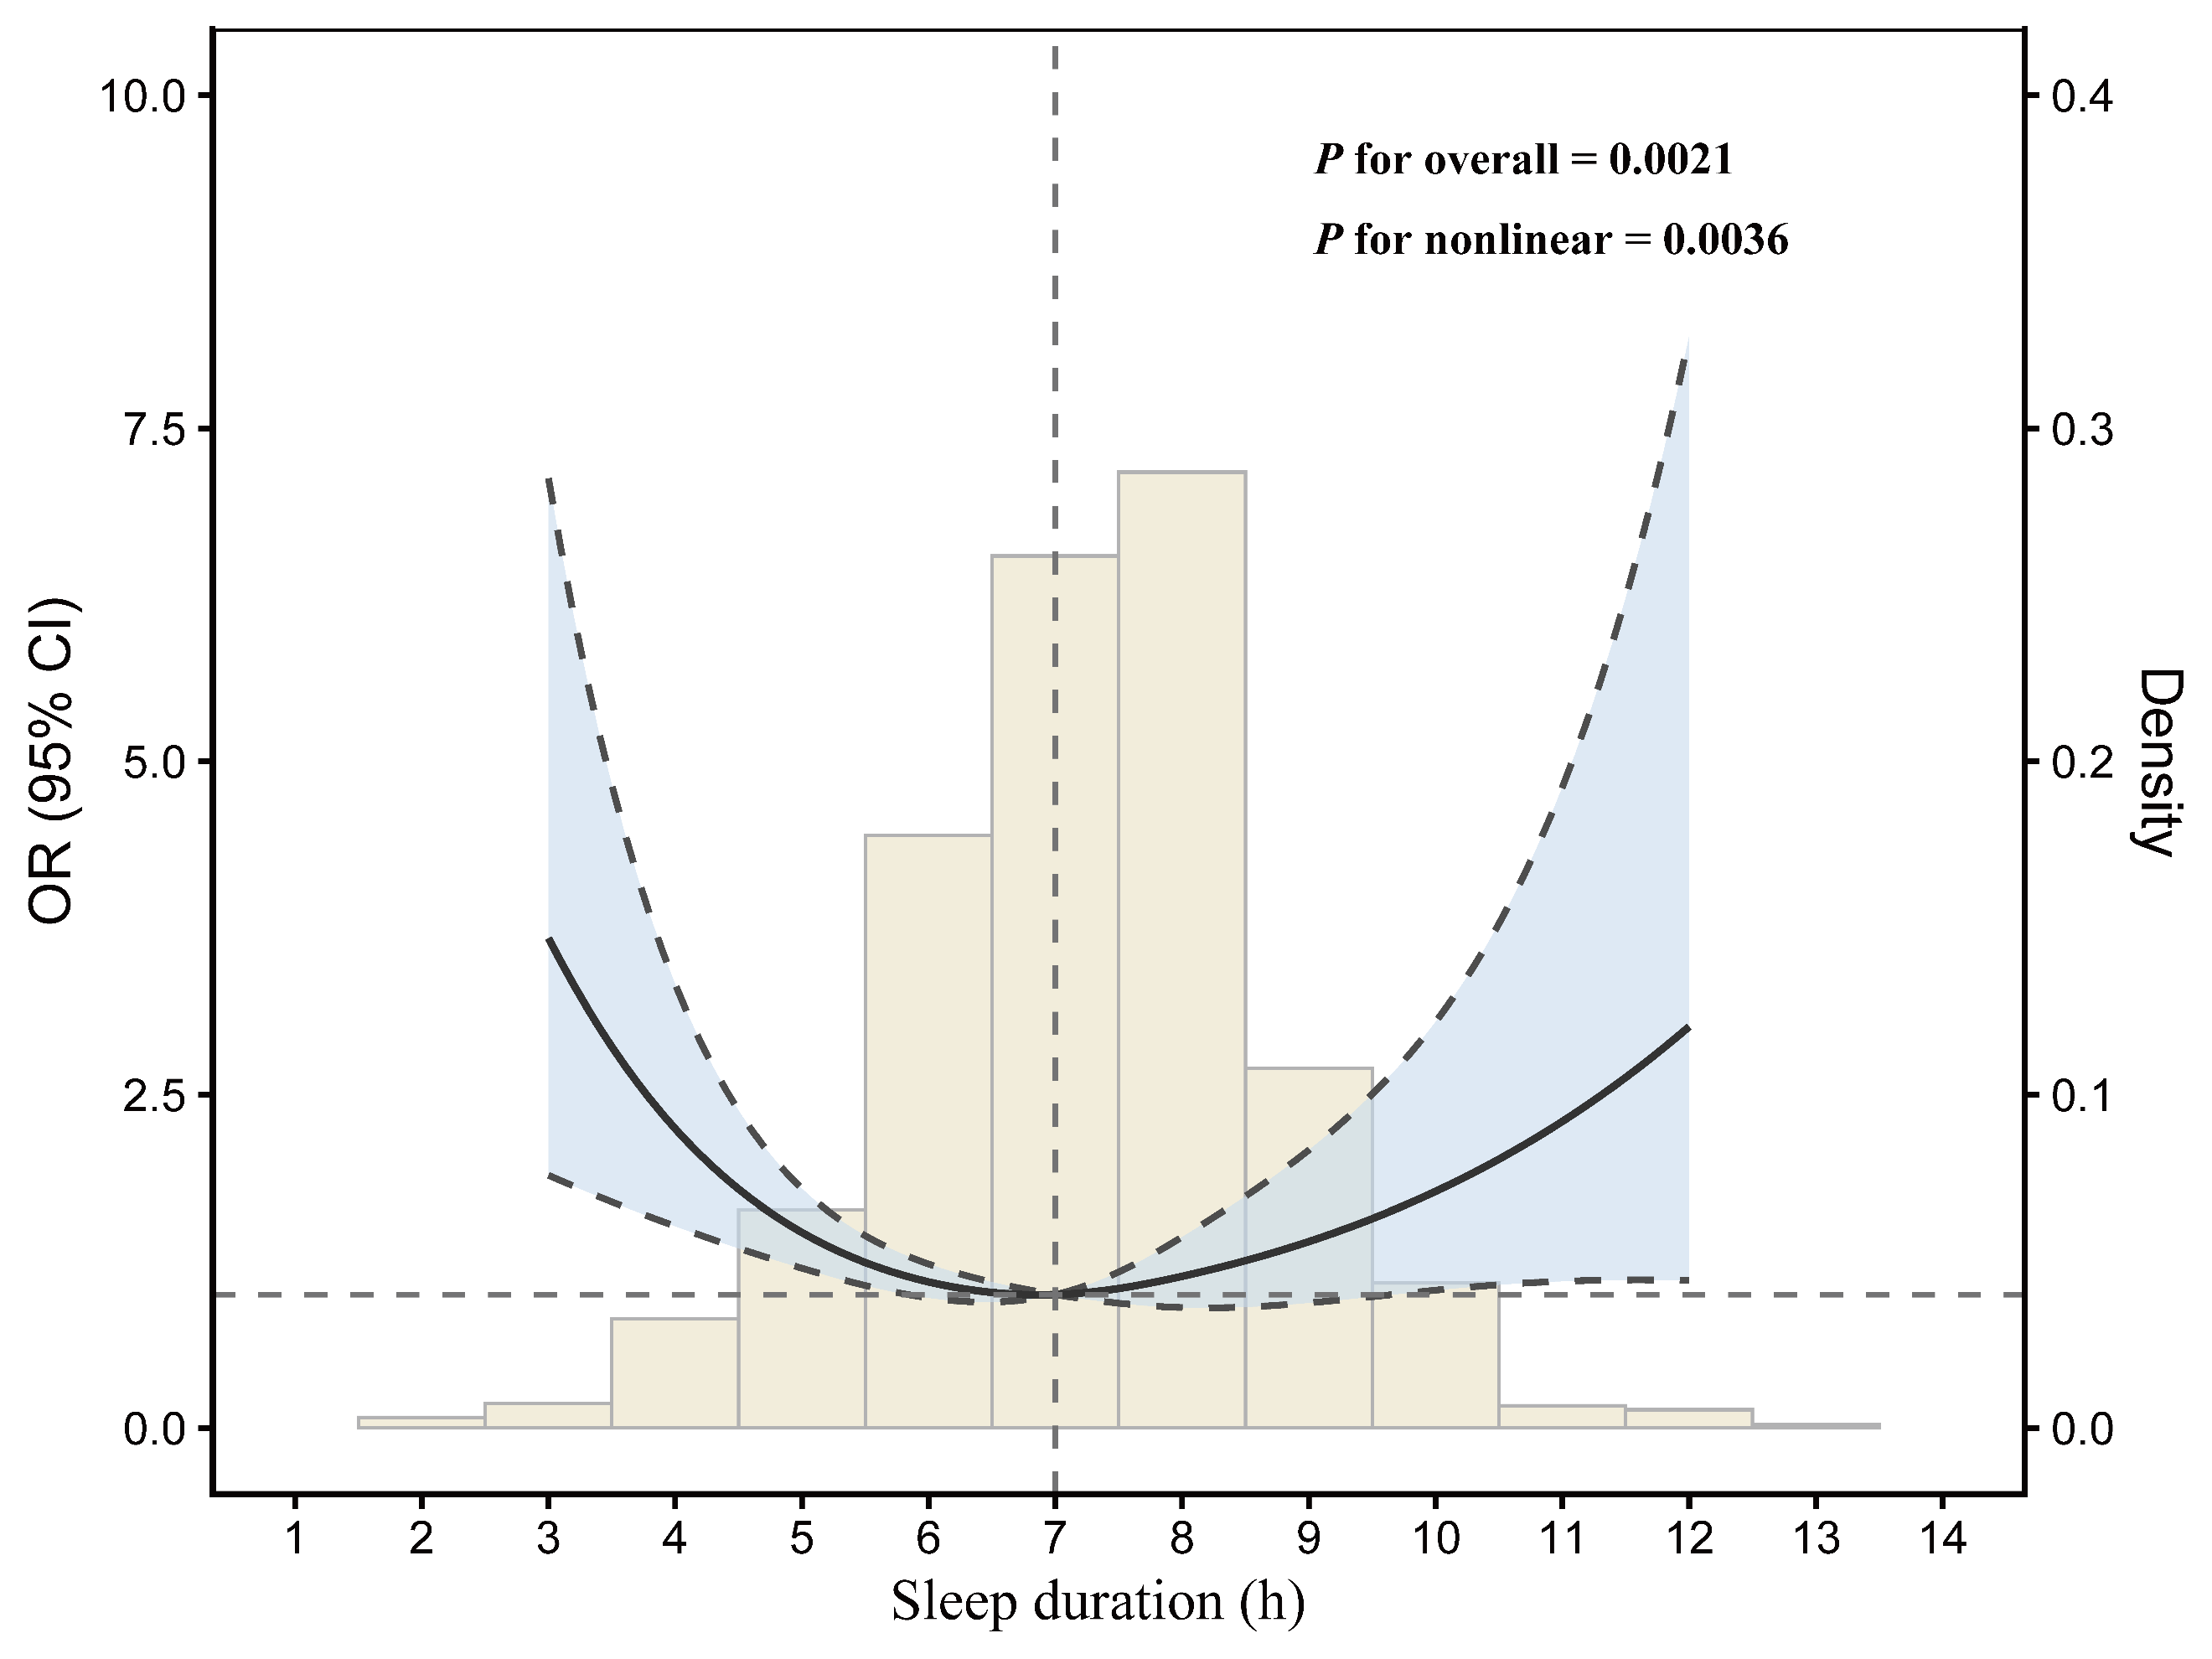
**

**Note:** Nonlinear association between sleep duration and osteoporosis after redefining osteoporosis using femoral neck BMD alone. The solid line represents the smoothed fitted curve, and the shaded area indicates the 95% confidence interval. Covariates adjusted for included age, race/ethnicity, marital status, level of education, smoking status, PIR, BMI, PA, sex hormone, energy intake, serum calcium, serum vitamin D, hypertension, diabetes, CKD, hyperlipidemia, and cancer
